# Supplementary material for: Doublecortin in the Fish Visual System, a Specific Protein of Maturing Neurons
Source: MDPI journal article supplement (doi:10.3390/biology11020248), 2022-02-06
Supplement: s1 [file s1]

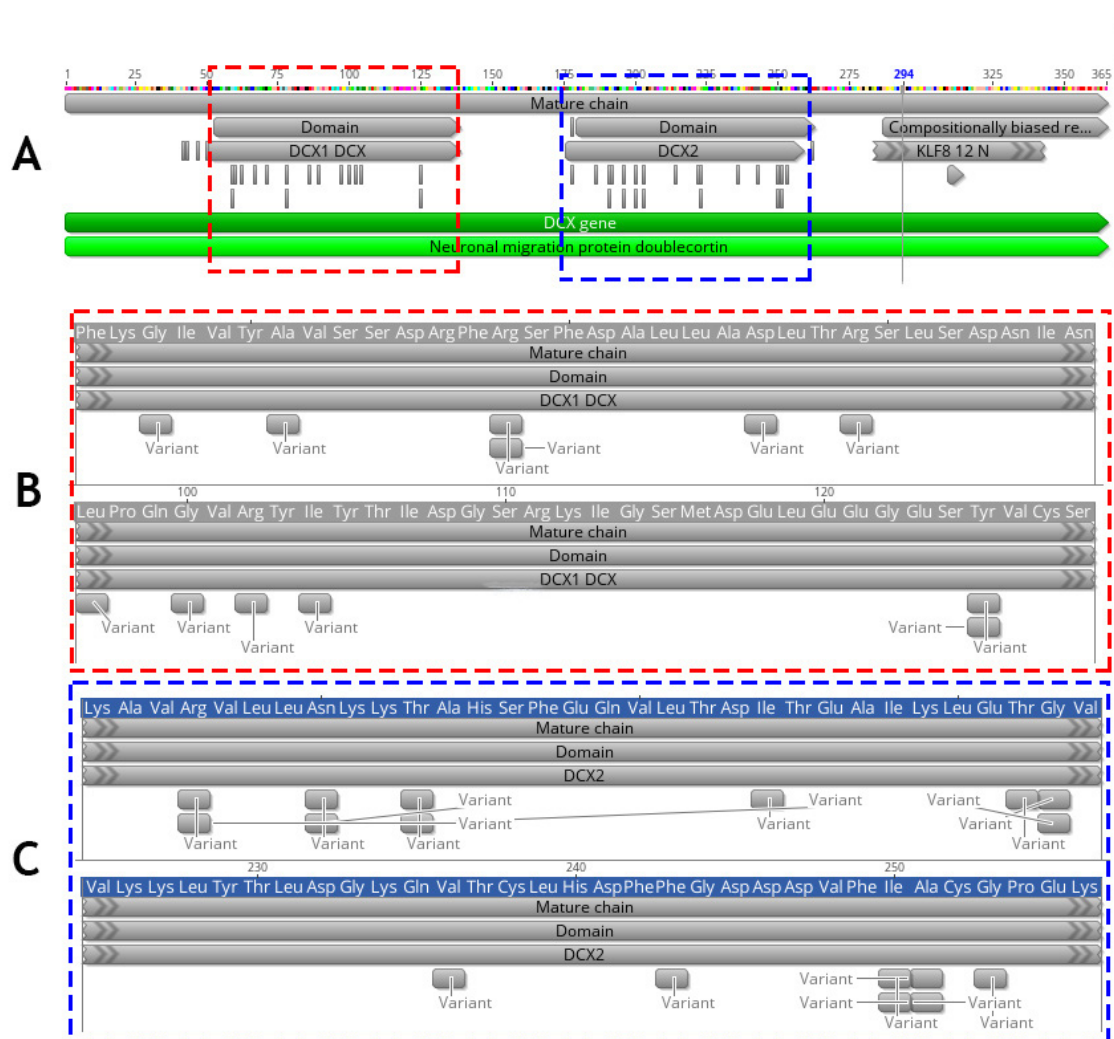

**Figure S1.** Scheme of DCX1 and DCX2 conserved domains found in DCX protein sequences.

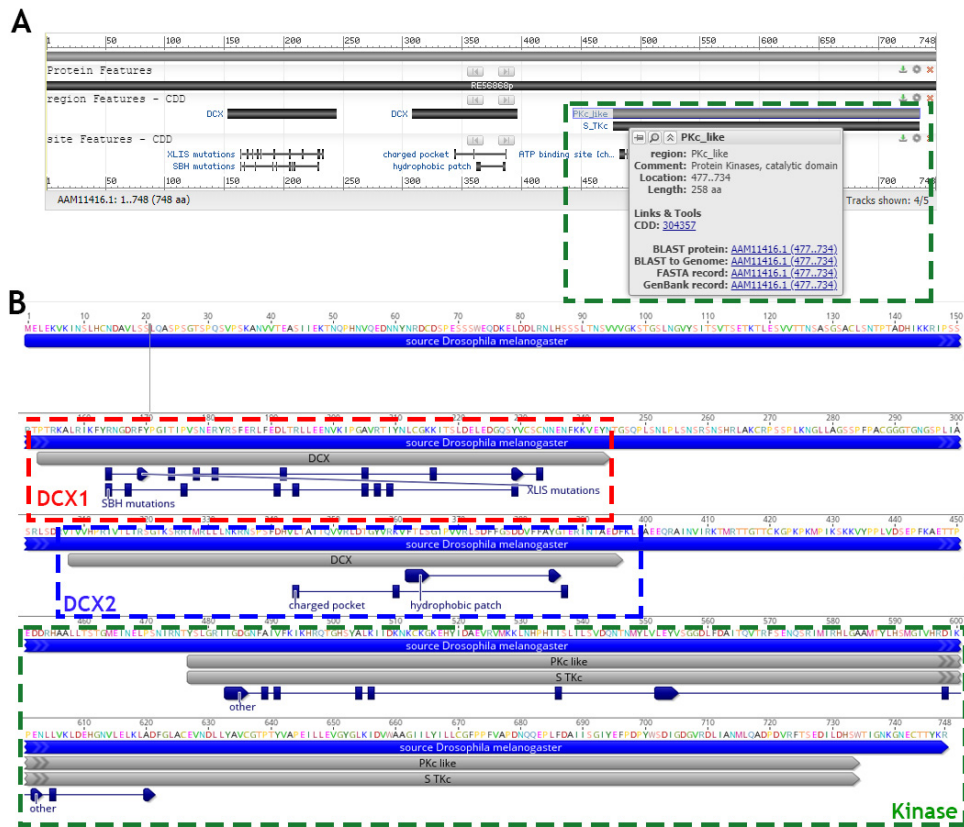

**Figure S2.** Scheme of the kinase conserved domain found in DCX protein sequences.

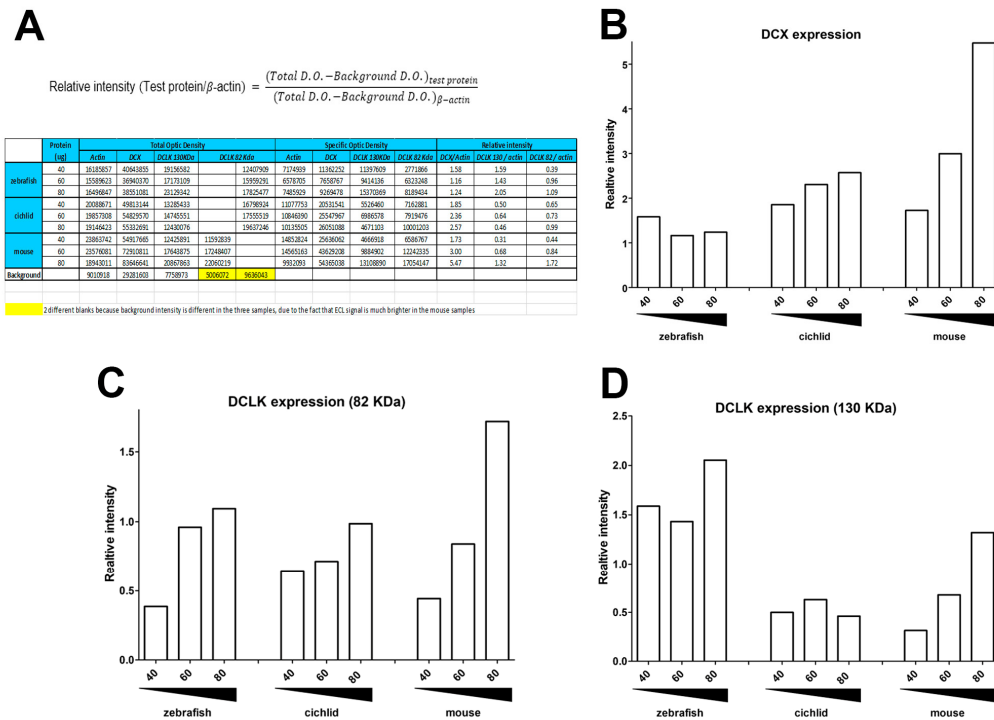

**Figure S3.** Relative intensity quantification of western blot.
