# Supplementary figures and images for: Doublecortin in the Fish Visual System, a Specific Protein of Maturing Neurons
Source: MDPI journal article supplement (doi:10.3390/biology11020248), 2022-02-06

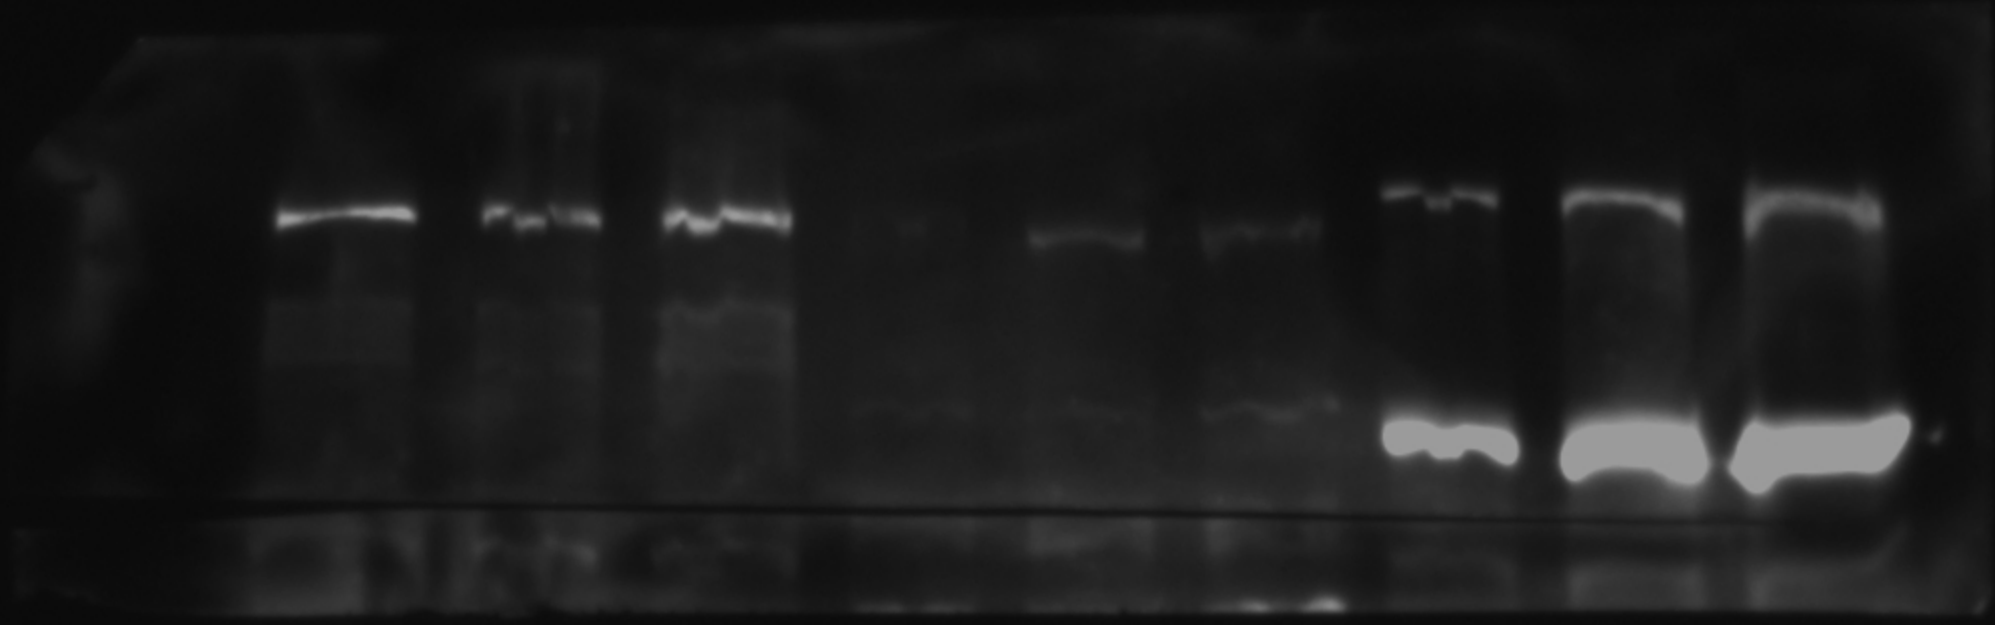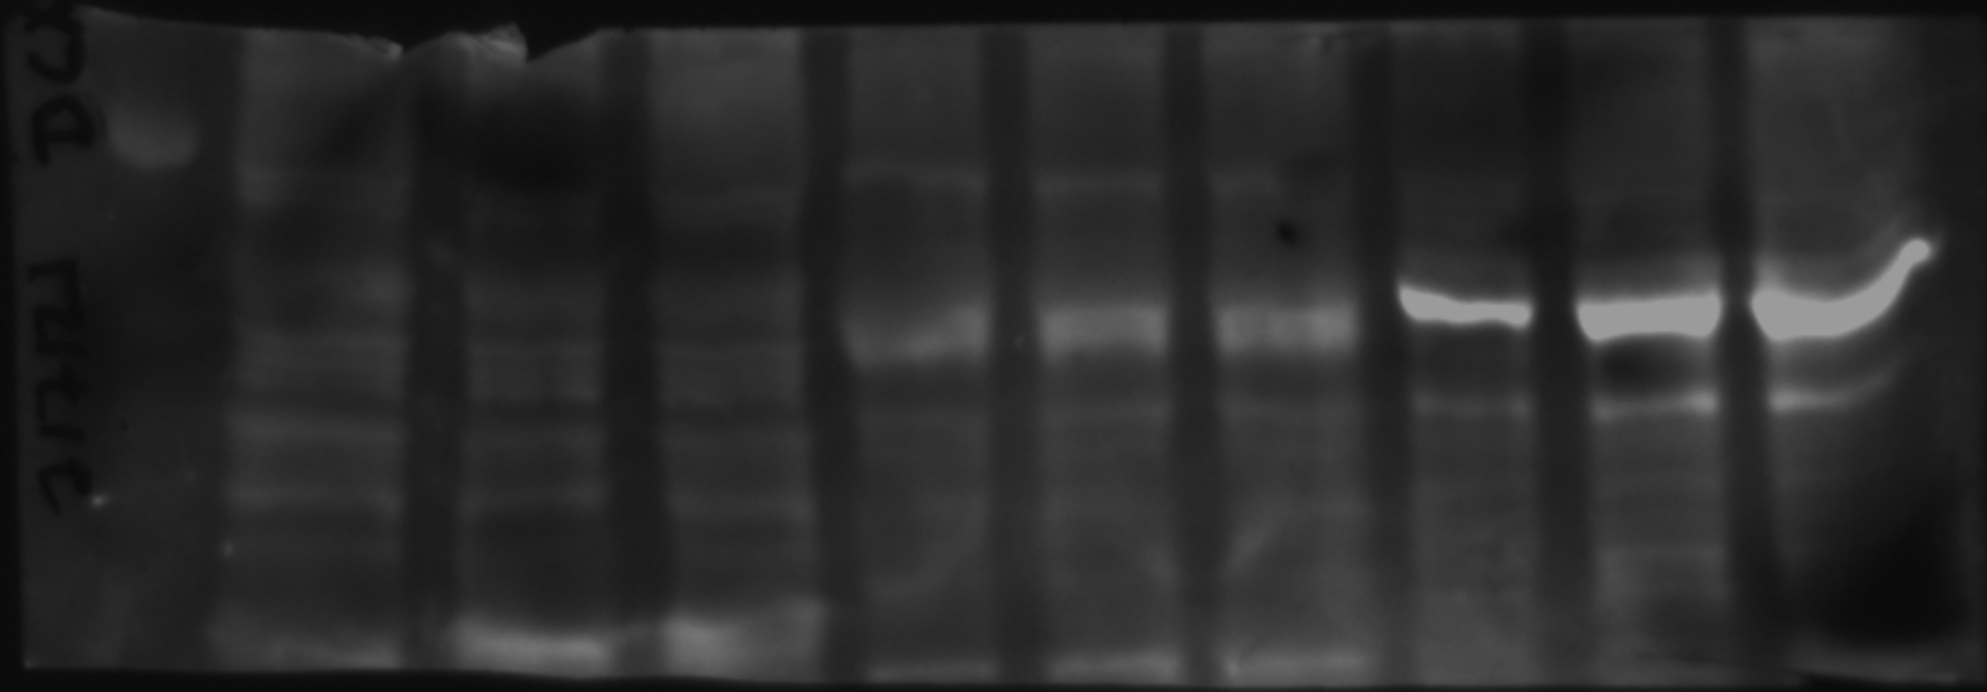

Supplement: s1 [file s1]
